# Supplementary material
Source: PubMed Central journal article supplement (PMC10274445)
Supplement: S136898002000350Xsup001.pdf [file S136898002000350Xsup001.pdf]

SUPPLEMENTARY TABLES

Supplementary Table 1. Consumer waste by world region and food group (%)

| World region                   | Food group |     |     |     |      |     |      |
|--------------------------------|------------|-----|-----|-----|------|-----|------|
|                                | CRL        | TBR | PNO | VAF | MEAT | SFD | MILK |
| North Africa                   | 12         | 6   | 2   | 12  | 8    | 4   | 2    |
| Sub-Saharan Africa             | 1          | 2   | 1   | 5   | 2    | 2   | 0.1  |
| North America                  | 27         | 30  | 4   | 28  | 11   | 33  | 15   |
| South America                  | 10         | 4   | 2   | 10  | 6    | 4   | 4    |
| Eastern and Western Asia       | 20         | 10  | 4   | 15  | 8    | 8   | 5    |
| Southeastern and Southern Asia | 3          | 3   | 1   | 7   | 4    | 2   | 1    |
| Europe                         | 25         | 17  | 4   | 19  | 2    | 11  | 7    |
| Oceania                        | 27         | 30  | 4   | 28  | 11   | 33  | 15   |

CRL=cereals, TBR=tubers, PNO=pulses, nuts, and oilcrops, VAF=vegetables and fruits, MEAT=meat, SFD=seafood, MILK=milk.

Source: Behrens et al. (2017)

Supplementary Table 2. FAO Food Balance Sheets food groups and food items

| Food group                         | Code  | Food items                                                                                                                                                                                                                                                              |
|------------------------------------|-------|-------------------------------------------------------------------------------------------------------------------------------------------------------------------------------------------------------------------------------------------------------------------------|
| Cereals                            | CRL   | Barley and products; Cereals, Other; Maize and products; Millet and products; Oats; Rice (Milled Equivalent); Rye and products; Sorghum and products; Wheat and products                                                                                                |
| Roots and tubers                   | TBR   | Cassava and products; Potatoes and products; Roots, Other; Sweet potatoes; Yams.                                                                                                                                                                                        |
| Sugar, sugar crops, and sweeteners | SUG   | Honey; Sugar (Raw Equivalent); Sugar beet; Sugar cane; Sugar non-centrifugal; Sweeteners, Other.                                                                                                                                                                        |
| Pulses, nuts, and oilcrops         | PNO   | Beans; Coconuts - Including Copra; Cottonseed; Groundnuts (Shelled Equivalent); Nuts and products; Oilcrops, Other; Olives (including preserved); Palm kernels; Peas; Pulses, Other and products; Rape and Mustard seed; Sesame seed; Soyabeans; Sunflower seed.        |
| Vegetables and fruits              | VAF   | Apples and products; Bananas; Citrus, Other; Dates; Fruits, Other; Grapefruit and products; Grapes and products (excluding wine); Lemons, Limes and products; Onions Oranges, Mandarines; Pineapples and products; Plantains; Tomatoes and products; Vegetables, Other. |
| Oils and fats from plants          | OAFP  | Palm kernel Oil; Butter, Ghee; Coconut Oil; Cottonseed Oil; Cream; Groundnut Oil; Maize Germ Oil; Oilcrops Oil, Other; Olive Oil; Palm Oil; Rape and Mustard Oil; Ricebran Oil; Sesame seed Oil; Soyabean Oil; Sunflower seed Oil.                                      |
| Oils and fats from animals         | OAFA  | Fats, Animals, Raw; Fish, Body Oil; Fish, Liver Oil.                                                                                                                                                                                                                    |
| Meat                               | MEAT  | Bovine Meat; Meat, Other; Mutton & Goat Meat; Offals, Edible; Pigmeat; Poultry Meat.                                                                                                                                                                                    |
| Seafood                            | SFD   | Aquatic Animals, Others; Aquatic Plants; Cephalopods; Crustaceans; Demersal Fish; Freshwater Fish; Marine Fish, Other; Meat, Aquatic Mammals; Molluscs, Other; Pelagic Fish.                                                                                            |
| Eggs                               | EGG   | Eggs                                                                                                                                                                                                                                                                    |
| Dairy                              | MILK  | Milk, excluding butter.                                                                                                                                                                                                                                                 |
| Other                              | OTHER | Beer; Beverages, Alcoholic; Beverages, Fermented; Cloves; Cocoa Beans and products<br>Coffee and products; Infant food; Miscellaneous; Pepper; Pimento; Spices, Other<br>Tea (including mate); Wine.                                                                    |
